# Supplementary material for: Examining Medical Student Volunteering During The COVID-19 Pandemic As A Prosocial Behavior During An Emergency
Source: bioRxiv or medRxiv preprint supplement (doi:10.1101/2021.07.06.21260058), 2021-07-07

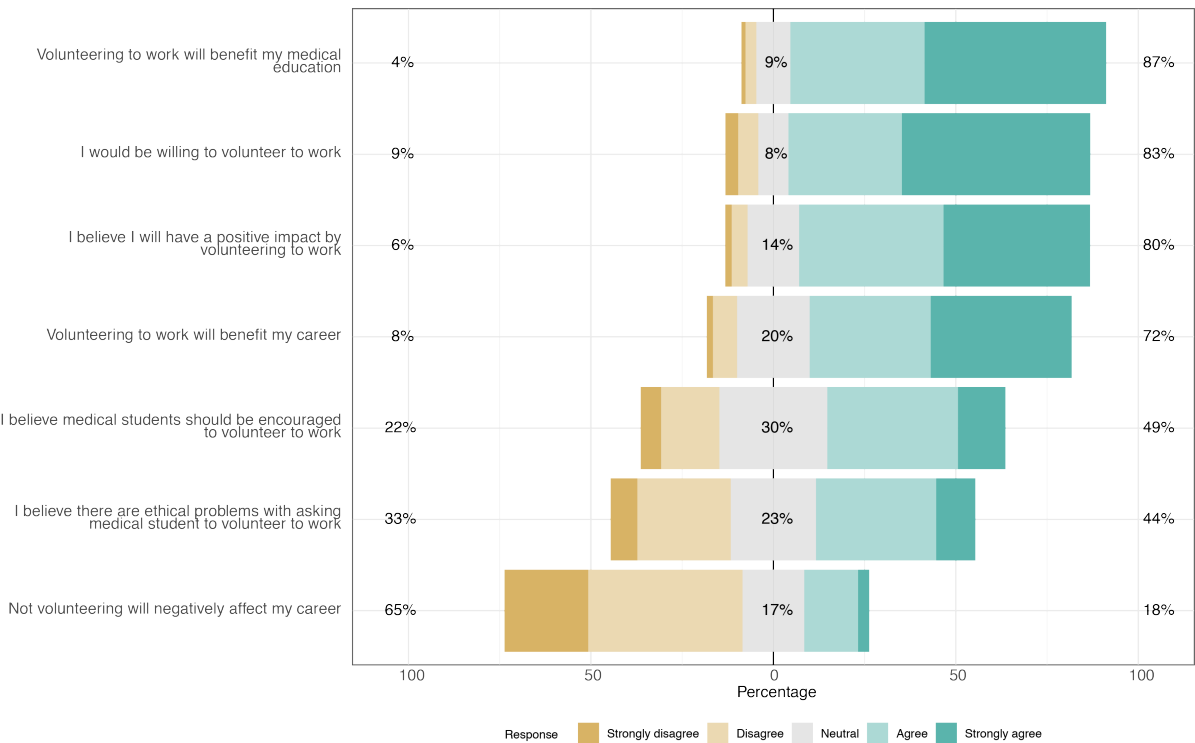

Supplement: Supplementary file [file media-4.pdf]
